# Supplementary material for: Solvent/additive-free synthesis of porous/zeolitic metal azolate frameworks from metal oxide/hydroxide
Source: Royal Society of Chemistry journal article supplement (doi:10.1039/c1cc12763b), 2011-01-01
Supplement: c1cc12763b.pdf [file c1cc12763b.pdf]

## Supporting Information

### **Solvent/additive-free synthesis of porous/zeolitic metal azolate frameworks from metal oxide/hydroxide**

Jian-Bin Lin,<sup>a</sup> Rui-Biao Lin,<sup>a</sup> Xiao-Ning Cheng,<sup>b</sup> Jie-Peng Zhang<sup>\*a</sup> and Xiao-Ming Chen<sup>a</sup>

<sup>a</sup> MOE Key Laboratory of Bioinorganic and Synthetic Chemistry, State Key Laboratory of Optoelectronic Materials and Technologies, School of Chemistry and Chemical Engineering, Sun Yat-Sen University, Guangzhou 510275, China. E-mail: zhangjp7@mail.sysu.edu.cn.

<sup>b</sup> Instrumental Analysis and Research Center, Sun Yat-Sen University, Guangzhou 510275, China.

## Experiment Section

**Materials and Methods.** Hmim (99%, Alfa Aesar) and other commercially available reagents were used as received without further purification. Hmdpt (3-(3-methyl-2-pyridyl)-5-(4-pyridyl)-1,2,4-triazole) was prepared according to a reported method.<sup>1</sup> Powder X-ray diffraction (PXRD) patterns were recorded on a Bruker D8 Advance diffractometer (Cu-K $\alpha$ ). Gas sorption isotherms were measured on a volumetric adsorption apparatus (ASAP 2020M for N<sub>2</sub>, Bel-max for CO<sub>2</sub>). Before the measurement, the samples were all activated under a dynamic vacuum up to 10<sup>-2</sup> Pa at 180 °C for 5 hrs. All compounds synthesized by different methods were measured with the same equilibrium criterion.

**Syntheses of MAF-4:** A mixture of ZnO (200 mg, 2.5 mmol) and Hmim (410 mg, 5.0 mmol) was grinded uniformly and then sealed in a 15-mL Teflon-lined autoclave and heated at 180°C for 12 hrs to give white powders (yield: 567 mg, ~100%). When the same vessel was naturally filled by a mixture of ZnO (2.44 g, 30 mmol) and Hmim (4.93 g, 60 mmol), a shaped material with an apparent density 0.46 g cm<sup>-3</sup> was obtained.

**Solvothermal synthesis of MAF-27:** A mixture of MgCl<sub>2</sub>·6H<sub>2</sub>O (100 mg, 0.50 mmol), Hmdpt (240 mg, 1.0 mmol), ethanol (10 mL) and Et<sub>3</sub>N (0.50 mL) was stirred continuously for 1 hr and then sealed in a 15-mL Teflon-lined autoclaves and heated at 160°C for 3 days, and then cooled by 5°C/hr to room temperature to give colorless crystals of MAF-27 (yield: 61 mg, 25 %), which was sometimes contaminated by some crystals of [Mg(mdpt)<sub>2</sub>(H<sub>2</sub>O)<sub>2</sub>]·2H<sub>2</sub>O.

**Solvothermal synthesis of MAF-28:** A mixture of Zn(NO<sub>3</sub>)<sub>2</sub>·6H<sub>2</sub>O (80 mg, 0.25 mmol), Hmdpt (120 mg, 0.50 mmol), ethanol (4.0 mL) and DMF (0.20 mL) was sealed in a 15-mL Teflon-lined autoclaves and heated at 160°C for 3 days, and then cooled by 5°C/hr to room temperature to give colorless crystals (yield: 88 mg, 65 %).

**Synthesis of MAF-27 and MAF-28 by OSFR:** A mixture of Mg(OH)<sub>2</sub> (15 mg, 0.25 mmol) or Zn(OH)<sub>2</sub> (25 mg, 0.25 mmol) and Hmdpt (119 mg, 0.50 mmol) was grinded uniformly and then sealed in a glass tube and heated at 300°C for 16 hrs to give white powders (yield: 124 and 134 mg for MAF-27 and MAF-28, respectively, ~100%).

Single-crystal of [Mg(mdpt)<sub>2</sub>(H<sub>2</sub>O)<sub>2</sub>]·2H<sub>2</sub>O can be also obtained by dissolving MAF-27 in 95% ethanol and then slowly evaporated in air for several weeks.

**Crystal Structure Determination.** Intensity data were collected on a Bruker Apex CCD area-detector diffractometer (Mo-K $\alpha$ ). Absorption corrections were applied by using the multi-scan program SADABS.<sup>2</sup> The structures were solved with direct method and refined with a full-matrix least-squares technique with the SHELXTL program package.<sup>3</sup> Anisotropic thermal parameters were applied to all non-hydrogen atoms except the guest molecules. The organic hydrogen atoms were generated geometrically. The solvent molecules in the MAF-27 and MAF-28 are highly disordered and cannot be modeled, thus the SQUEEZE routine<sup>4</sup> was applied to remove the contributions to the scattering from the solvent molecules.

- 1 E. J. Browne, *Aust. J. Chem.* 1975, **28**, 2543.
- 2 G. M. Sheldrick, University Göttingen: Göttingen, Germany 2002.
- 3 Bruker Analytical Instrumentation: Madison, WI 2000.
- 4 A. L. Spek, *J. Appl. Crystallogr.* 2003, **36**, 7.

**Table S1.** Crystallographic data.

| Complex                                             | MAF-27                                            | MAF-28                                             | [Mg(mdpt) <sub>2</sub> (H <sub>2</sub> O) <sub>2</sub> ].2H <sub>2</sub> O |
|-----------------------------------------------------|---------------------------------------------------|----------------------------------------------------|----------------------------------------------------------------------------|
| Formula                                             | C <sub>26</sub> H <sub>20</sub> MgN <sub>10</sub> | C <sub>26</sub> H <sub>20</sub> N <sub>10</sub> Zn | C <sub>26</sub> H <sub>28</sub> MgN <sub>10</sub> O <sub>4</sub>           |
| Formula weight                                      | 496.83                                            | 537.89                                             | 568.89                                                                     |
| Crystal system                                      | Hexagonal                                         | Hexagonal                                          | Monoclinic                                                                 |
| Space group                                         | $R\bar{3}$                                        | $R\bar{3}$                                         | $P2_1/c$                                                                   |
| $a/\text{\AA}$                                      | 27.085(6)                                         | 27.214(9)                                          | 7.9467(5)                                                                  |
| $b/\text{\AA}$                                      | 27.085(6)                                         | 27.214(9)                                          | 11.6001(8)                                                                 |
| $c/\text{\AA}$                                      | 10.329(6)                                         | 10.206(6)                                          | 29.750(2)                                                                  |
| $\beta/^\circ$                                      | 120                                               | 120                                                | 92.9390(10)                                                                |
| $V/\text{\AA}^3$                                    | 6562(4)                                           | 6546(5)                                            | 2738.8(3)                                                                  |
| $Z$                                                 | 9                                                 | 9                                                  | 4                                                                          |
| $D_c/\text{g cm}^{-3}$                              | 1.132                                             | 1.228                                              | 1.380                                                                      |
| $\mu/\text{mm}^{-1}$                                | 0.092                                             | 0.875                                              | 0.118                                                                      |
| reflns coll.                                        | 8142                                              | 5258                                               | 15692                                                                      |
| unique reflns                                       | 2572                                              | 2521                                               | 5373                                                                       |
| $R_{\text{int}}$                                    | 0.1481                                            | 0.0656                                             | 0.0517                                                                     |
| $R_1 [I > 2 \sigma]^{[a]}$                          | 0.0751                                            | 0.0680                                             | 0.0633                                                                     |
| $wR_2 [I > 2 \sigma]^{[b]}$                         | 0.1265                                            | 0.1181                                             | 0.1619                                                                     |
| $R_1$ (all data)                                    | 0.2207                                            | 0.1204                                             | 0.1010                                                                     |
| $wR_2$ (all data)                                   | 0.1444                                            | 0.1300                                             | 0.1958                                                                     |
| GOF                                                 | 1.000                                             | 1.008                                              | 1.002                                                                      |
| $\Delta\rho_{\text{min/max}}/\text{e}/\text{\AA}^3$ | 0.260/-0.266                                      | 0.836/-0.578                                       | 0.567/-0.518                                                               |

$$R_1 = \sum ||F_o| - |F_c|| / \sum |F_o|. \quad wR_2 = [\sum w(F_o^2 - F_c^2)^2 / \sum w(F_o^2)^2]^{1/2}.$$

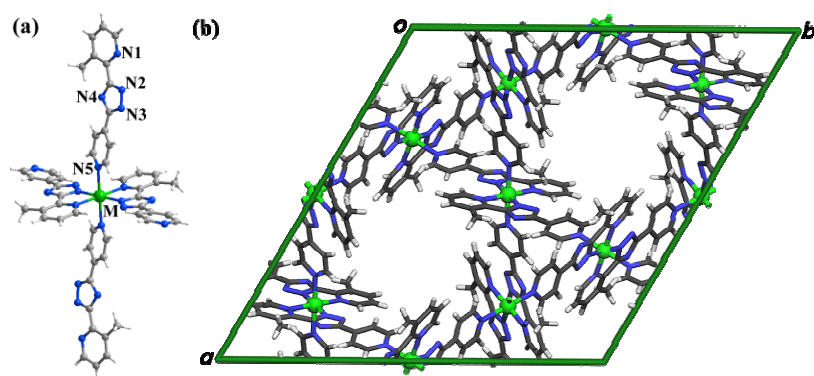

**Fig. S1** (a) Coordination environment of the  $M^{II}$  ion, and (b) the framework structure viewed along the  $c$ -axis of MAF-27/28.

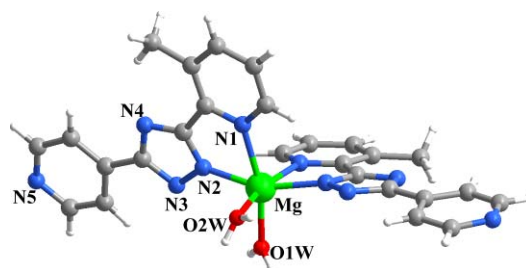

**Fig. S2** Molecular structure of  $[Mg(mdpt)_2(H_2O)_2] \cdot 2H_2O$ .

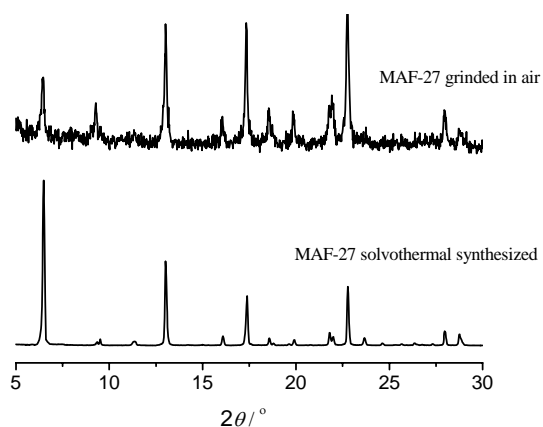

**Fig. S3** PXRD patterns of the solvothermally synthesized MAF-27 before and after grinded in air (crystallinity lowered).

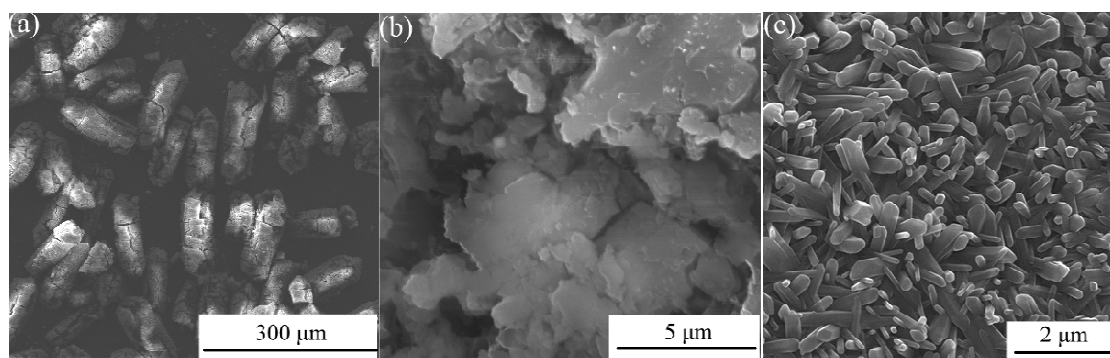

**Fig. S4** SEM images of MAF-27 obtained by solvothermal method: (a) before and (b) after grinding, and (c) by OSFR.

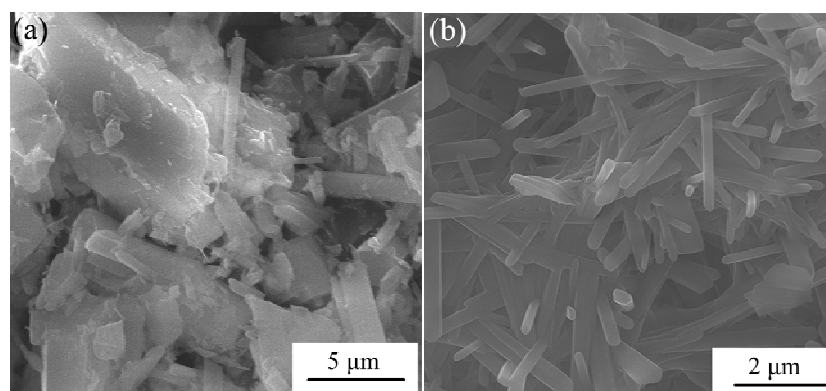

**Fig. S5** SEM images of MAF-27 obtained by (a) solvothermal method, and (b) by OSFR.

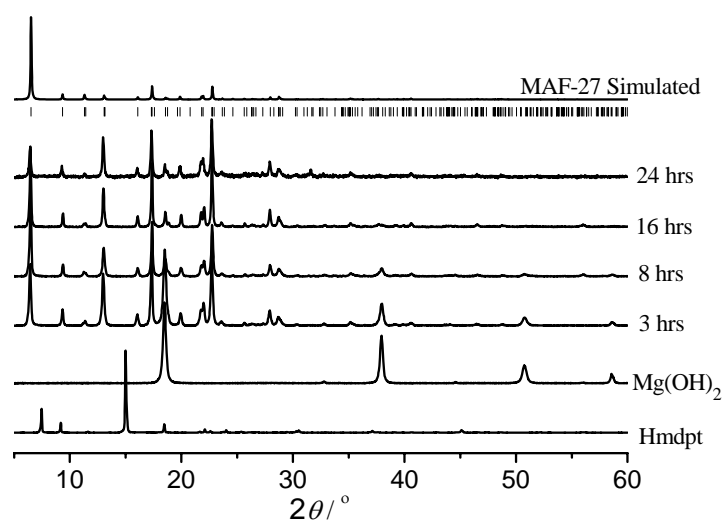

**Fig. S6** PXRD patterns of Hmdpt,  $\text{Mg}(\text{OH})_2$ , the mixture of Hmdpt and  $\text{Mg}(\text{OH})_2$  after heated at  $300^\circ\text{C}$  for different time, and simulated MAF-27.

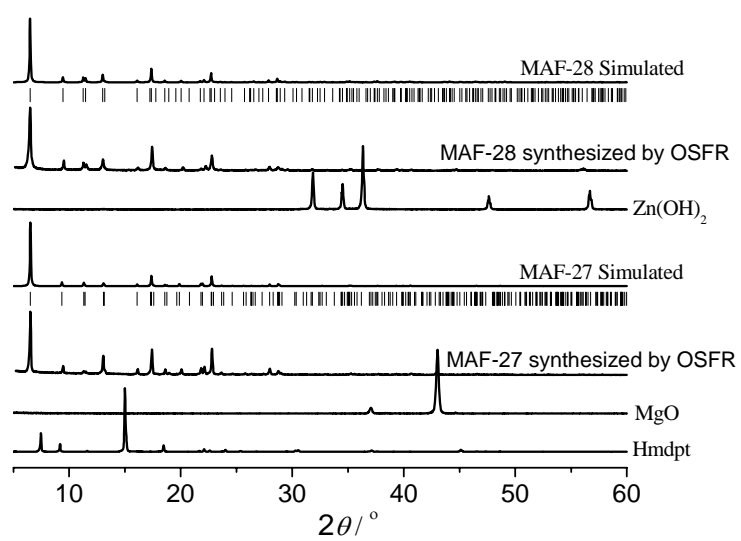

**Fig. S7** PXRD patterns of Hmdpt, MgO, MAF-27 synthesized by OSFR, simulated MAF-27, Zn(OH)<sub>2</sub>, MAF-28 synthesized by OSFR, and simulated MAF-28.

**Table S2.** Indexing and refinement results of PXRD patterns of MAF-4, MAF-27 and 28 obtained by OSFR.

| Complex        | MAF-4     | MAF-27     | MAF-28     |
|----------------|-----------|------------|------------|
| Space group    | $I43m$    | $R\bar{3}$ | $R\bar{3}$ |
| $a/\text{\AA}$ | 16.909(4) | 27.124(15) | 26.082(12) |
| $b/\text{\AA}$ | 16.909(4) | 27.124(15) | 26.082(12) |
| $c/\text{\AA}$ | 16.909(4) | 10.231(6)  | 9.705(4)   |
| $R_{wp}$       | 6.27%     | 6.34%      | 7.08%      |
| $R_p$          | 4.59%     | 4.67%      | 5.09%      |

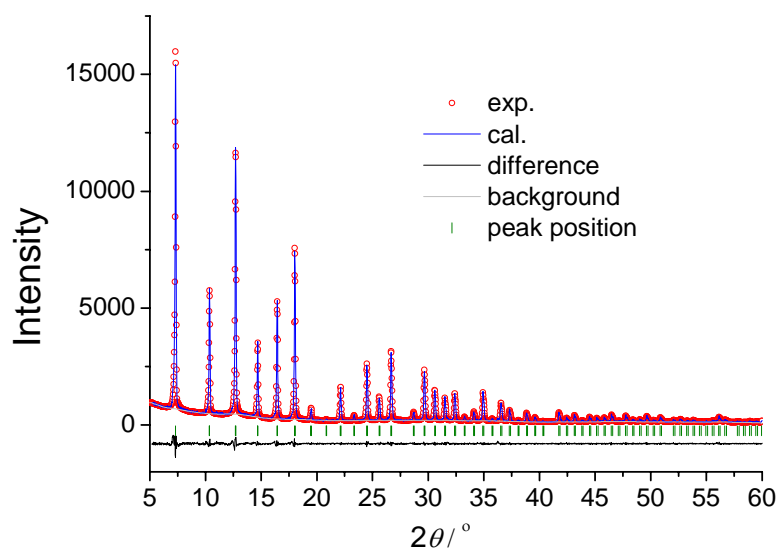

**Fig. S8** Pawley fitting of PXRD pattern of MAF-4 obtained by OSFR.

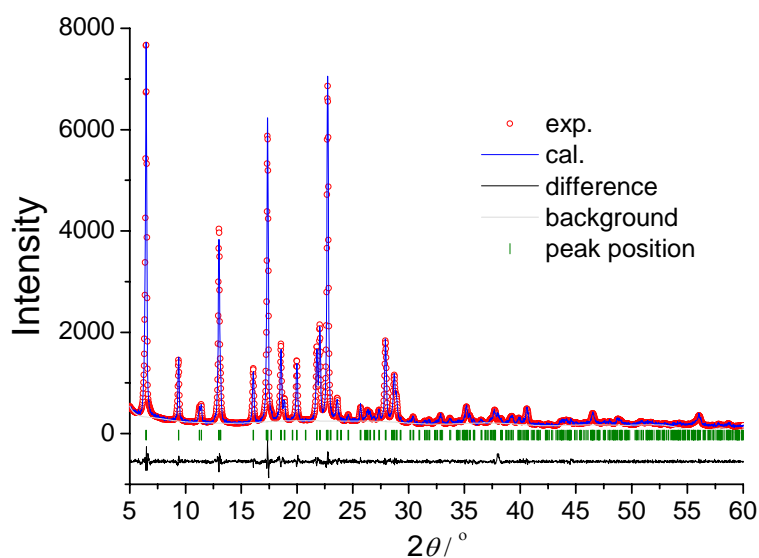

**Fig. S9** Pawley fitting of PXRD pattern of MAF-27 obtained by OSFR.

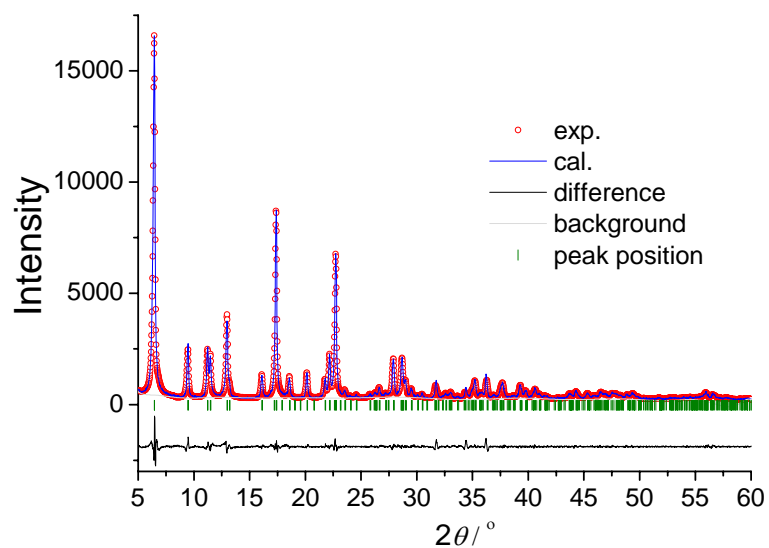

**Fig. S10** Pawley fitting of PXRD pattern of MAF-28 obtained by OSFR.
